# Supplementary material for: Lack of Effect of Gluten Challenge on Fecal Microbiome in Patients With Celiac Disease and Non-Celiac Gluten Sensitivity
Source: PubMed Central journal article supplement (PMC8691493; doi:10.14309/ctg.0000000000000441), 2021-12-20

**Supplementary Figure 1.** (A) Weighted Unifrac within each group. All pairwise comparisons of timepoints within each study group: not significant at  $\alpha=5\%$ . (B) Weighted Unifrac of all groups over time. Pairwise comparisons between study groups: CD vs. control,  $p=0.03$ ; NCGS vs. Control,  $p=0.006$ ; CD vs. NCGS,  $p=0.01$ .

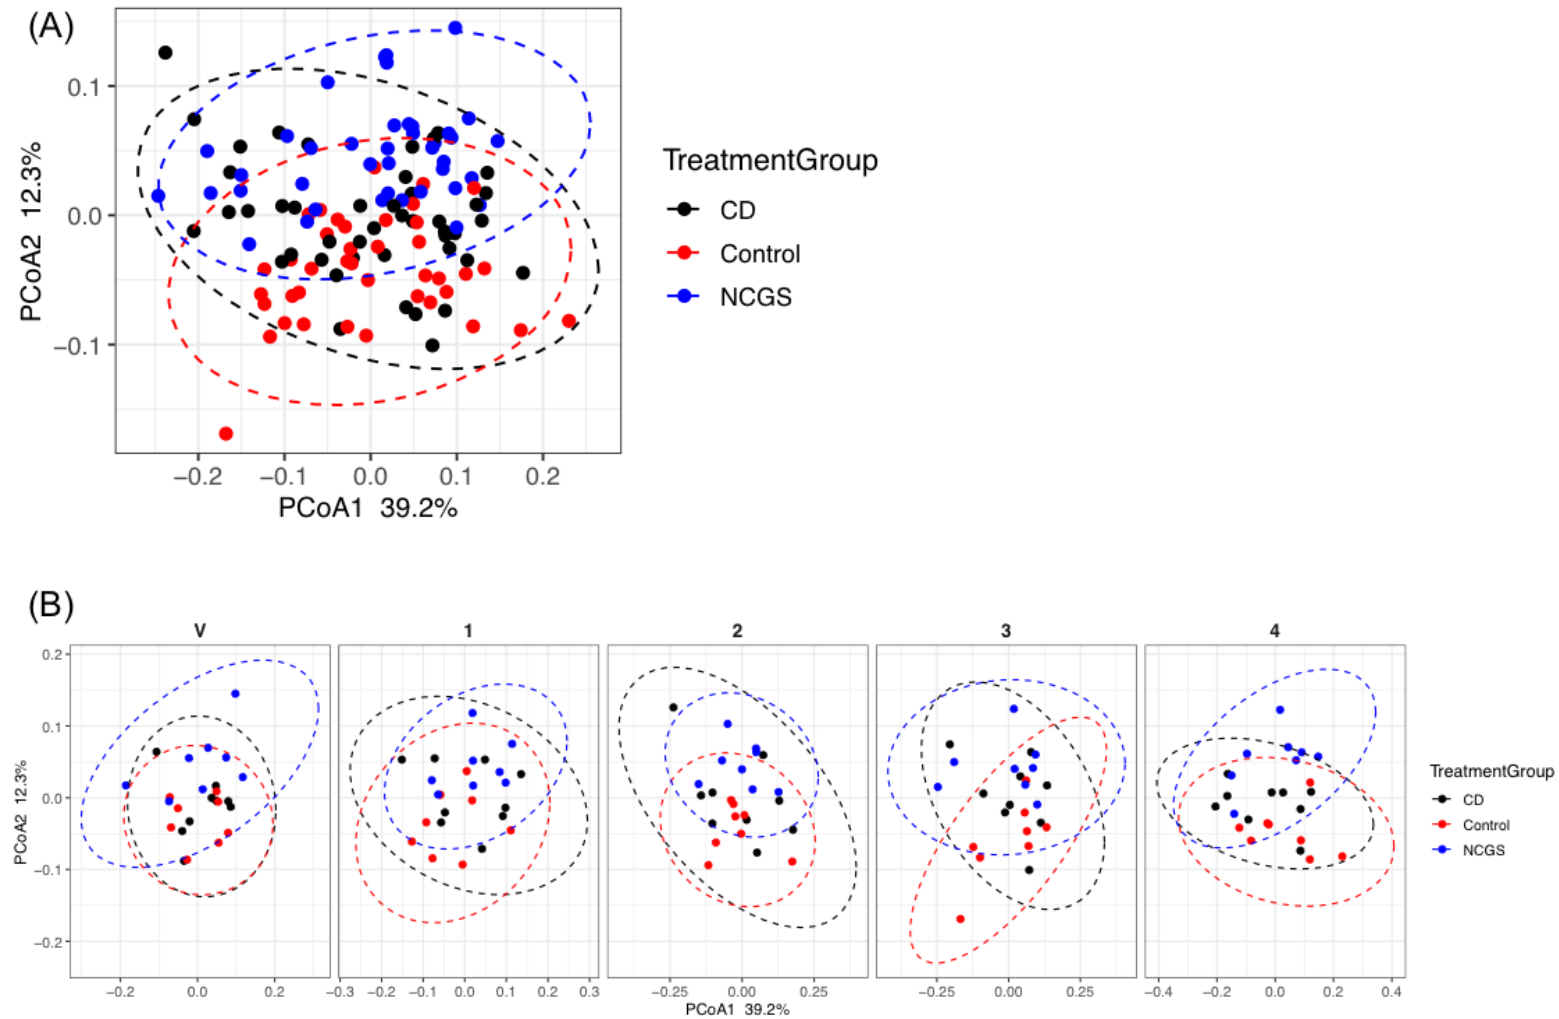

**Supplementary Figure 2.** (A) Bray-Curtis differences within each group. All pairwise comparisons of timepoints within each study group: not significant at  $\alpha=5\%$ . (B) Bray-Curtis distances of all groups over time. All study group comparisons  $p<0.001$ , adjusted for multiple timepoints.

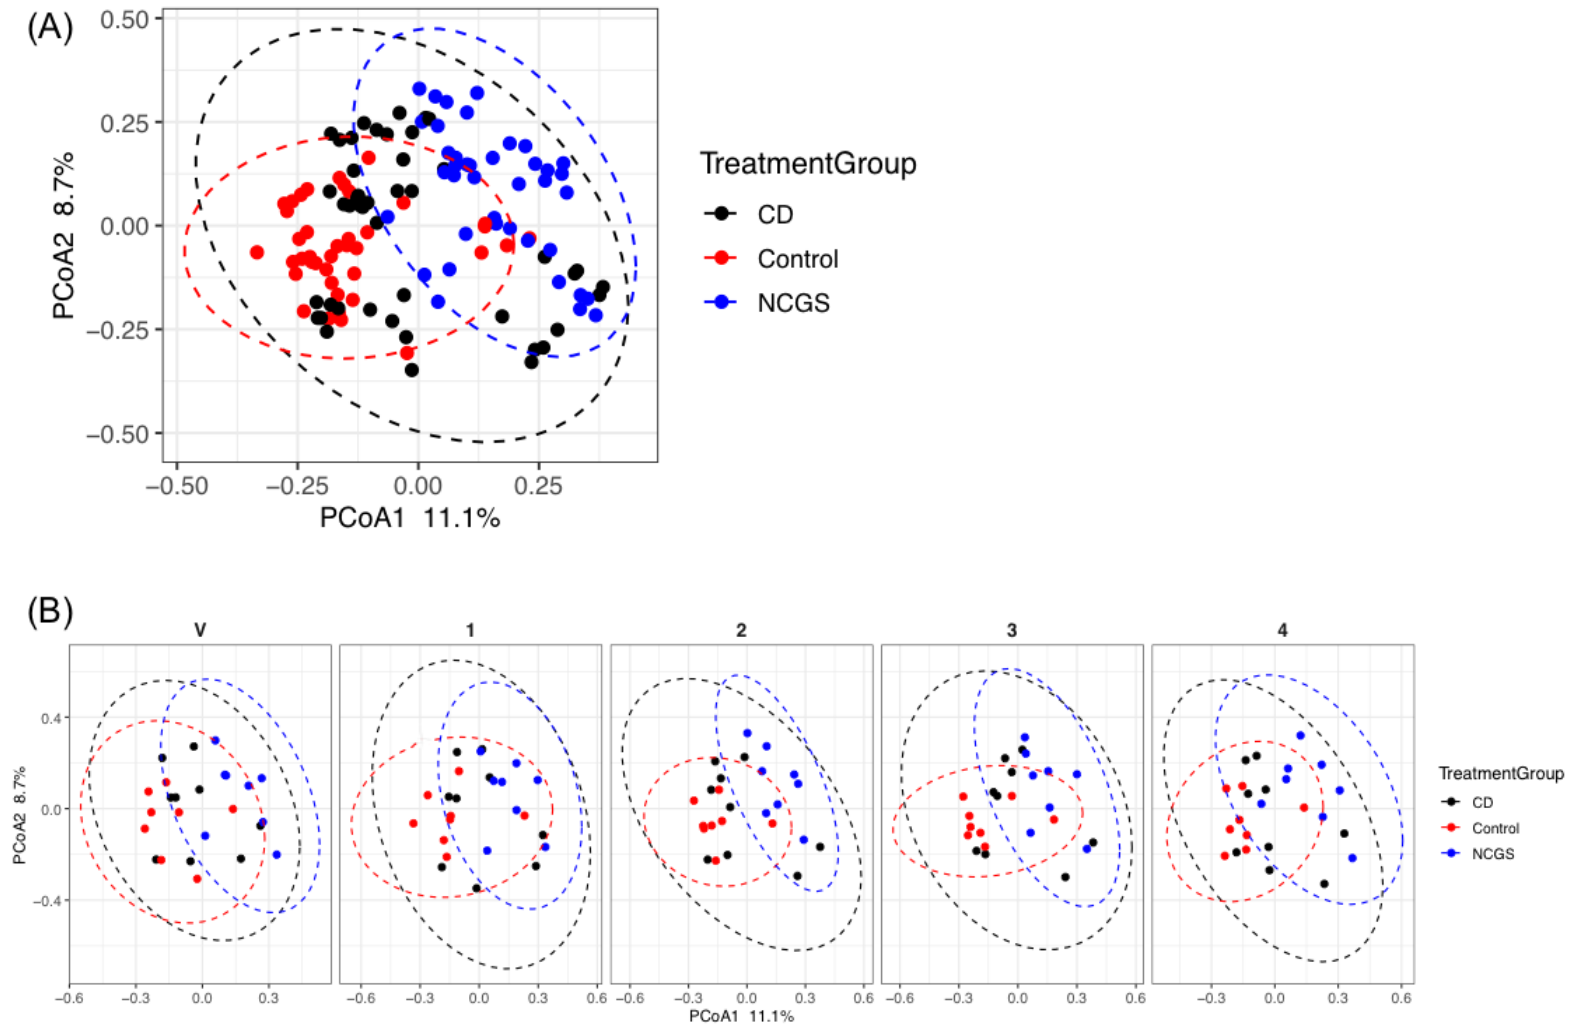

**Supplementary Figure 3.** Differential abundance of taxa at Timepoint 1 in CD and NCGS groups compared to control.

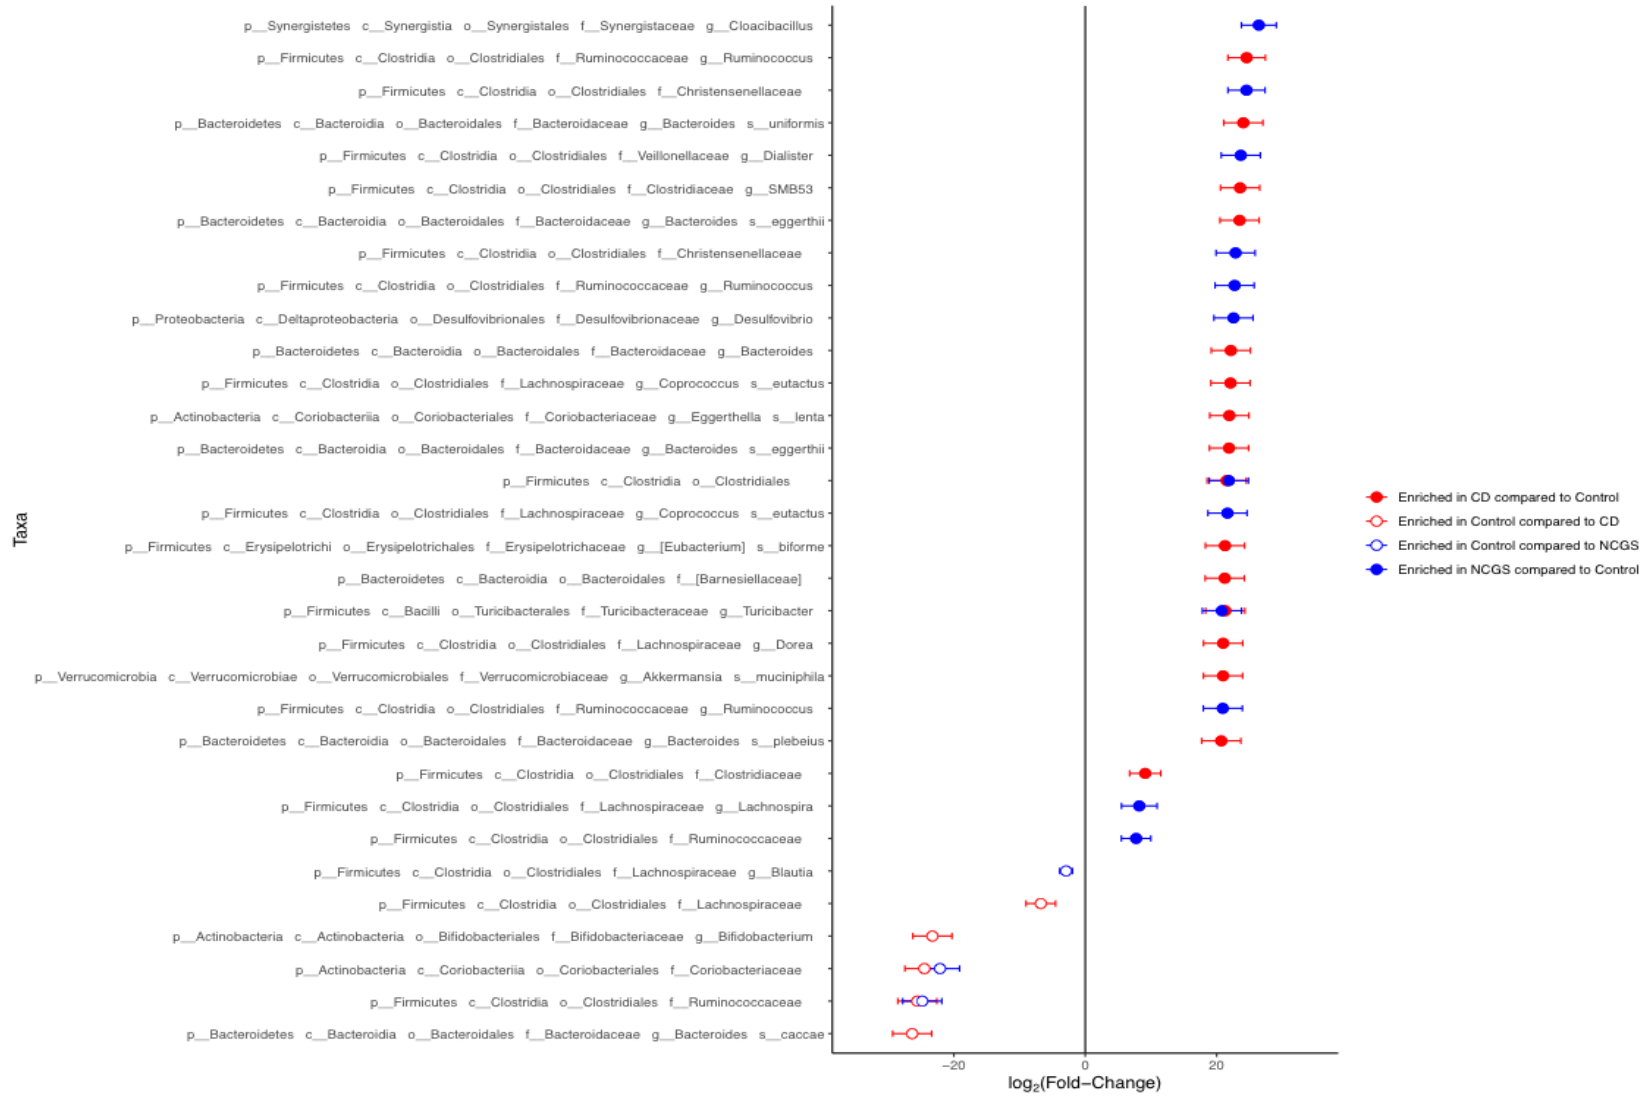

**Supplementary Figure 4.** Differential abundance of taxa at Timepoint 2 in CD and NCGS groups compared to control.

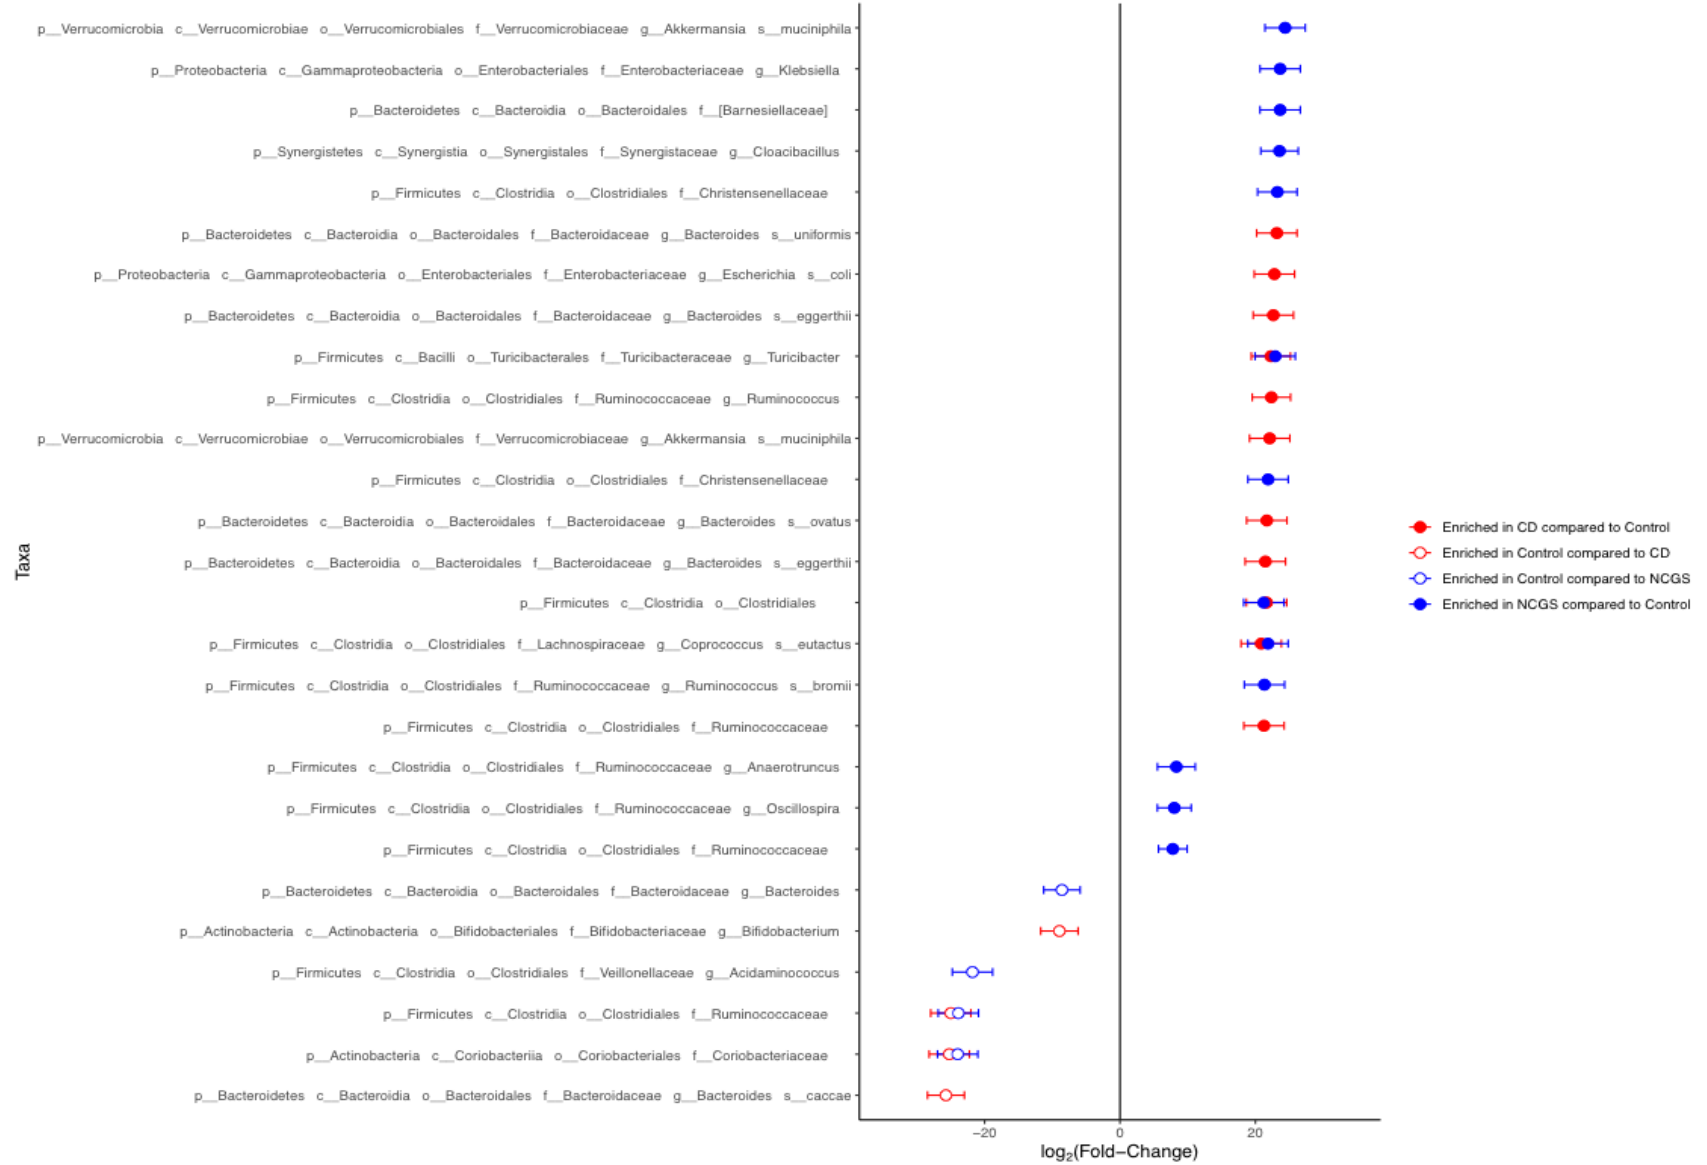

**Supplementary Figure 5.** Differential abundance of taxa at Timepoint 3 in CD and NCGS groups compared to control.

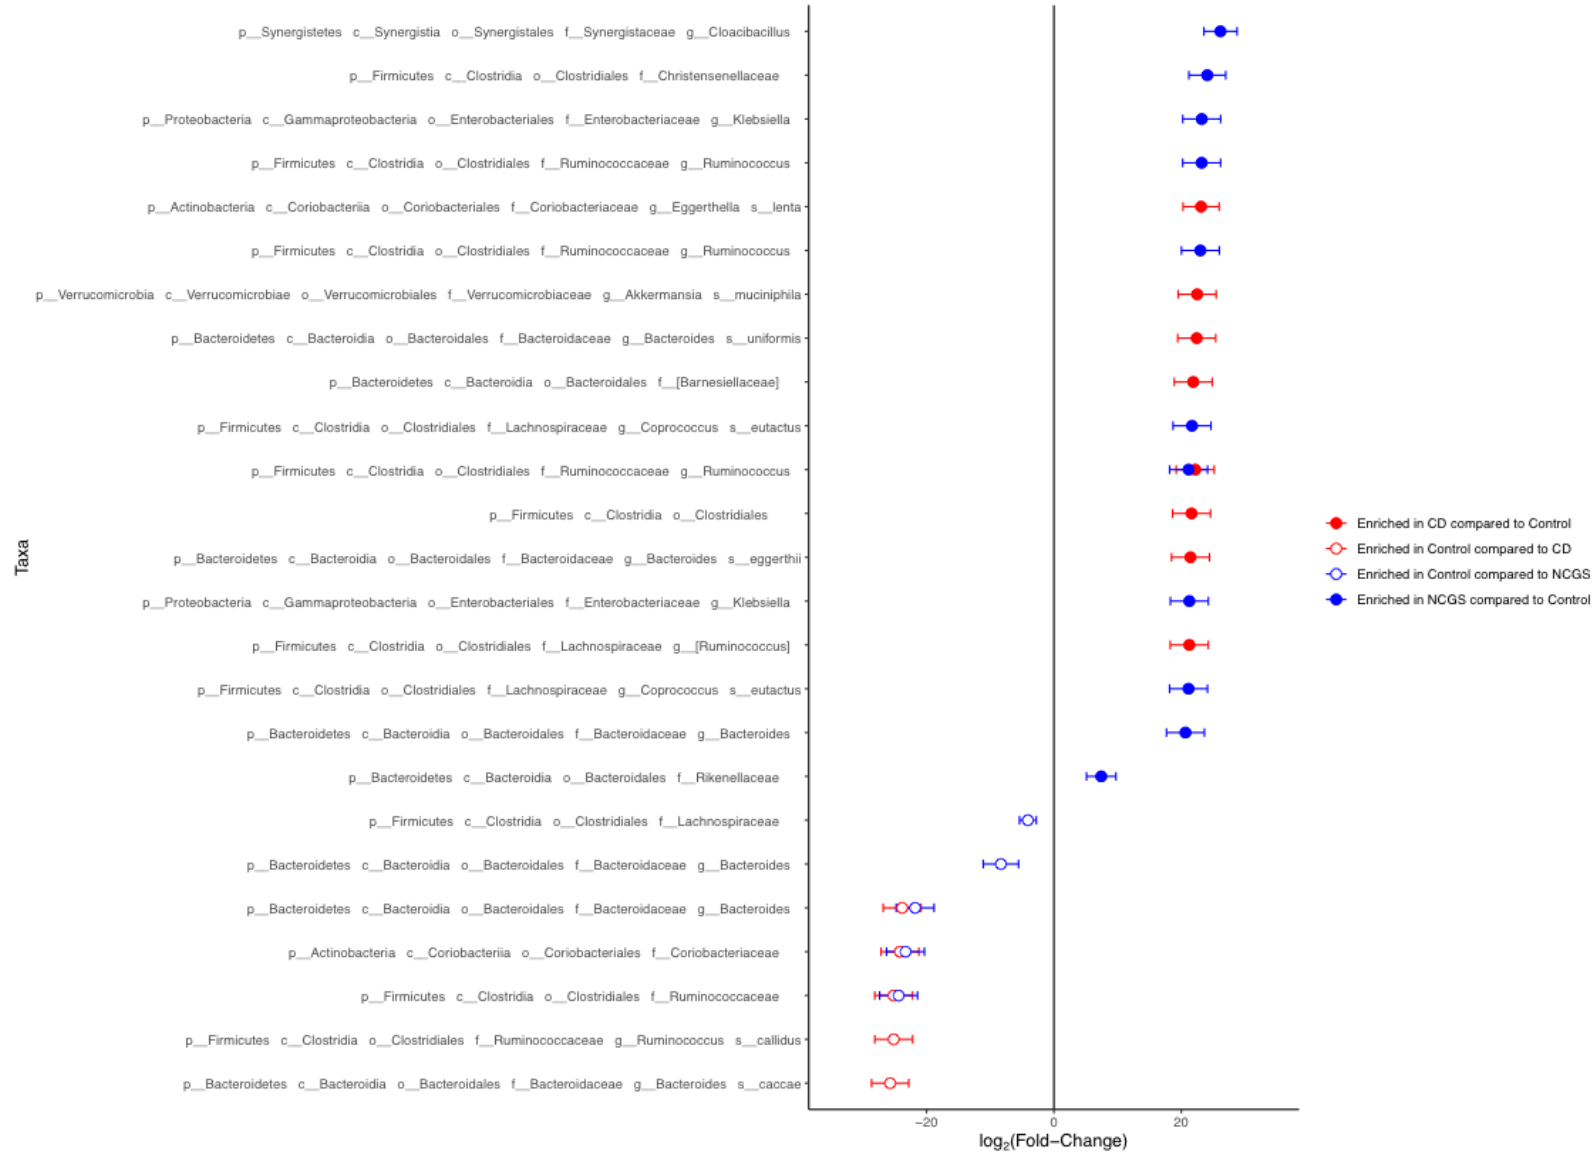

**Supplementary Figure 6.** Differential abundance of taxa at Timepoint 4 in CD and NCGS groups compared to control.

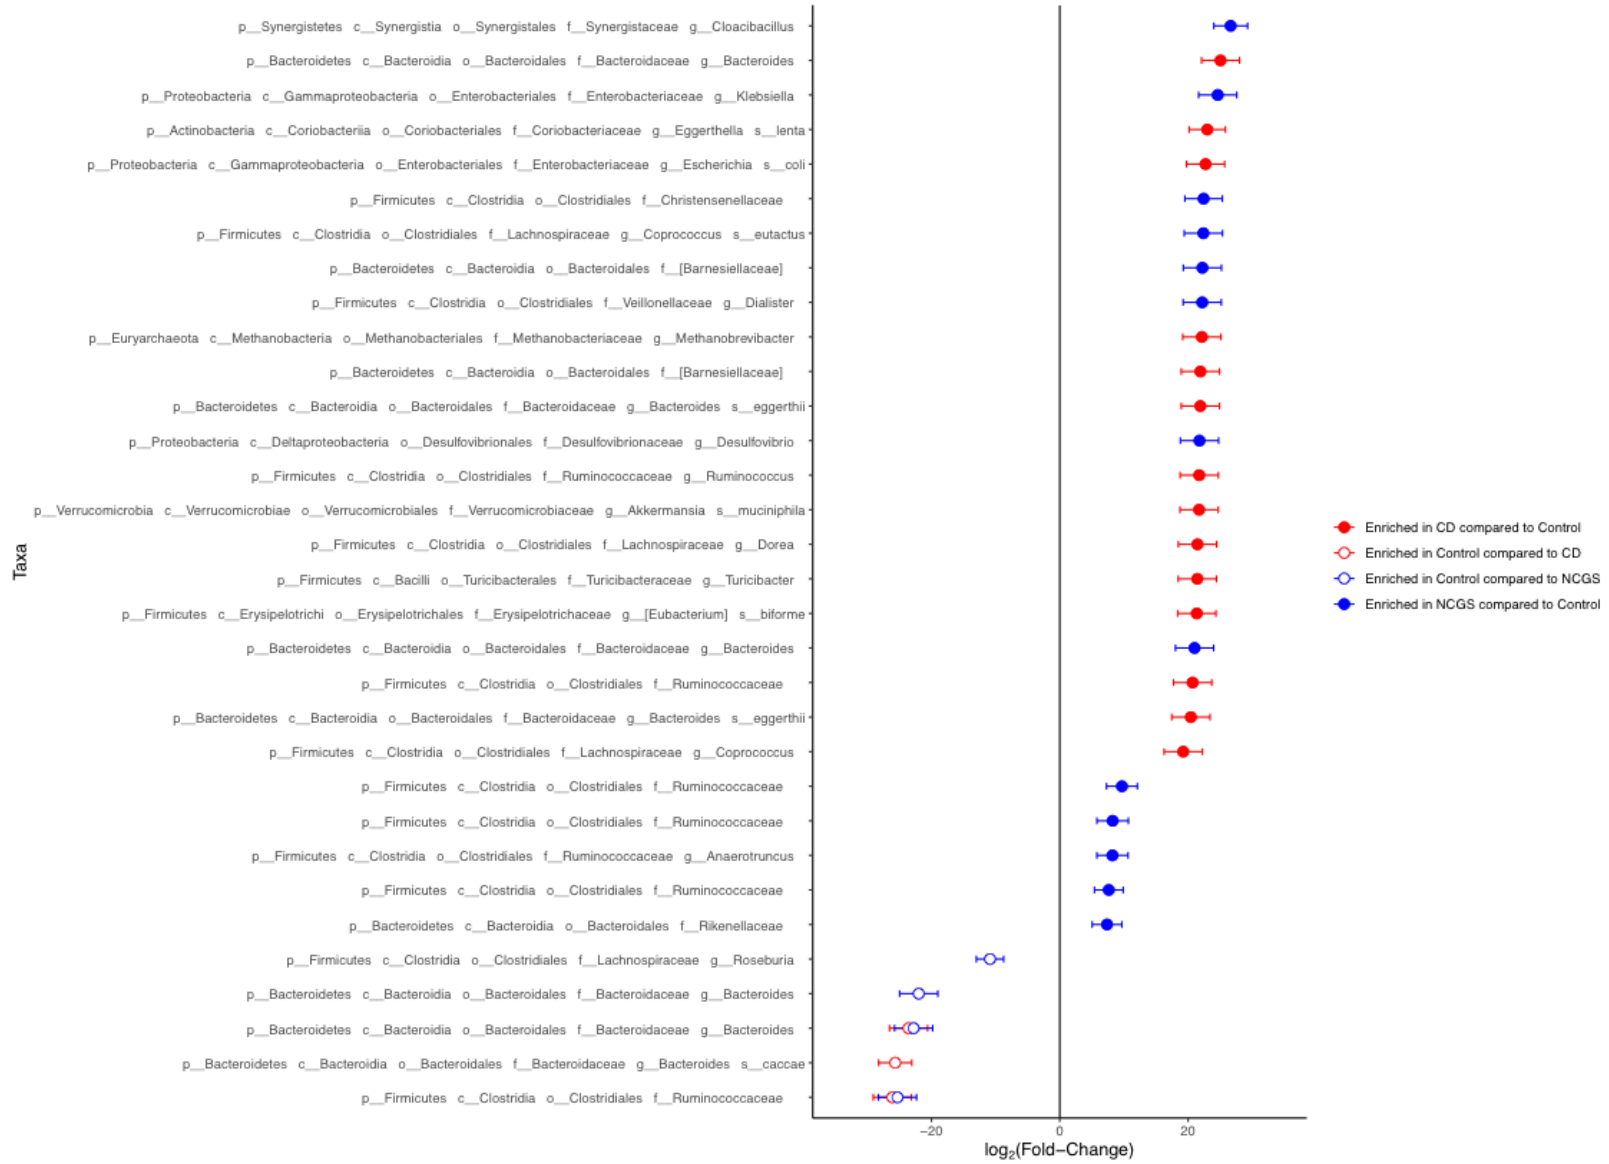

**Supplementary Figure 7.** (A) GSRS overall score and symptom subgroup scores for each study group. (B) Question 5 from the GSRS, which asks about nausea and vomiting. Scale 1-7, where higher score indicates more severe symptoms. All pairwise comparisons between Timepoint 2, 3, or 4 and Timepoint 1 within each study group: not significant at  $p < 0.02$ , adjusting for multiple comparisons.

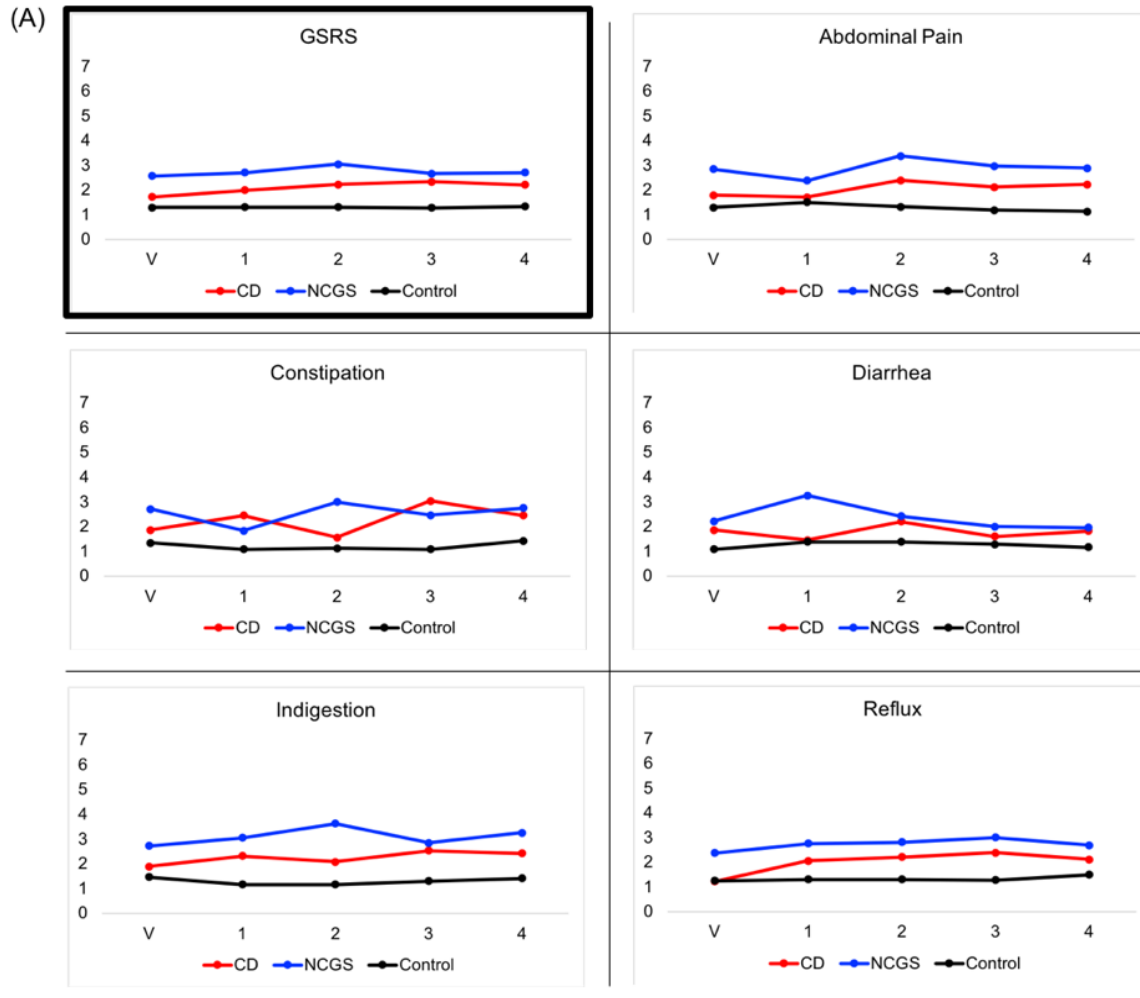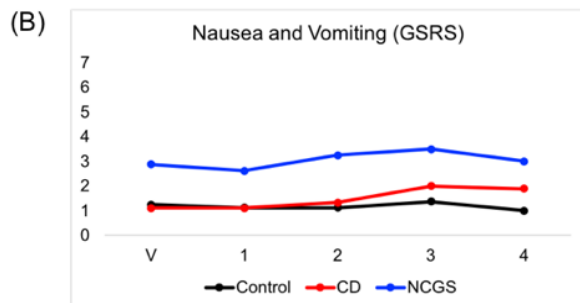

**Supplementary Figure 8.** SF36 health concepts. Each health concept is graded from 0-100% indicating percent of total possible score achieved, where higher score indicates more favorable health state and lower score indicates more severe symptoms. All pairwise comparisons between Timepoint 2, 3, or 4 and Timepoint 1 within each study group: not significant at  $p < 0.02$ , adjusting for multiple comparisons.

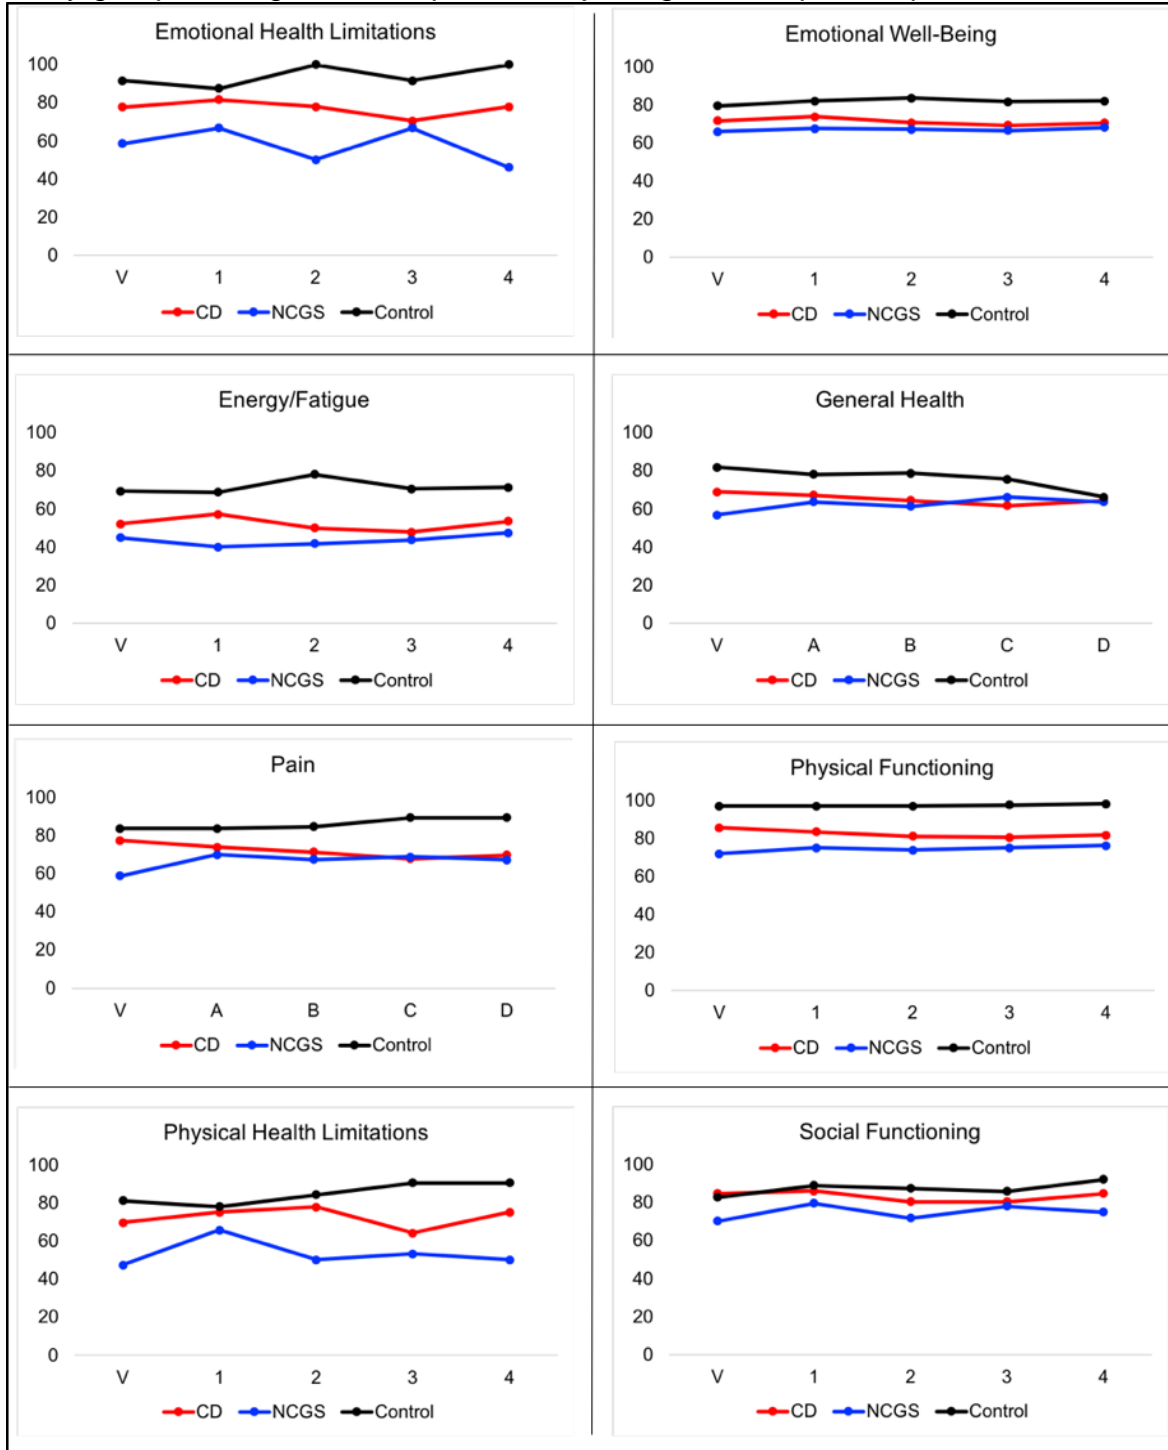



**Supplementary Figure 9.** (A) Numbers of subjects with high and low overall symptoms at Timepoints 2, 3, and 4 relative to Timepoint 1, according to treatment group. (B) Numbers of subjects with high and low diarrhea symptom at Timepoints 2, 3, and 4 relative to Timepoint 1, according to treatment group.

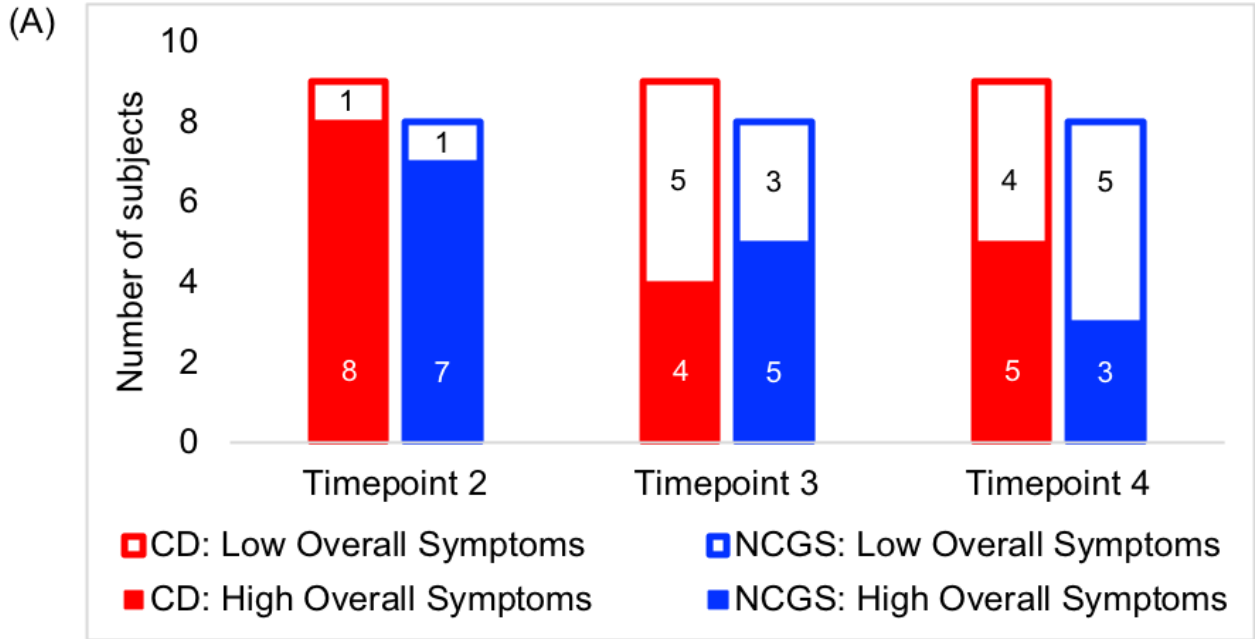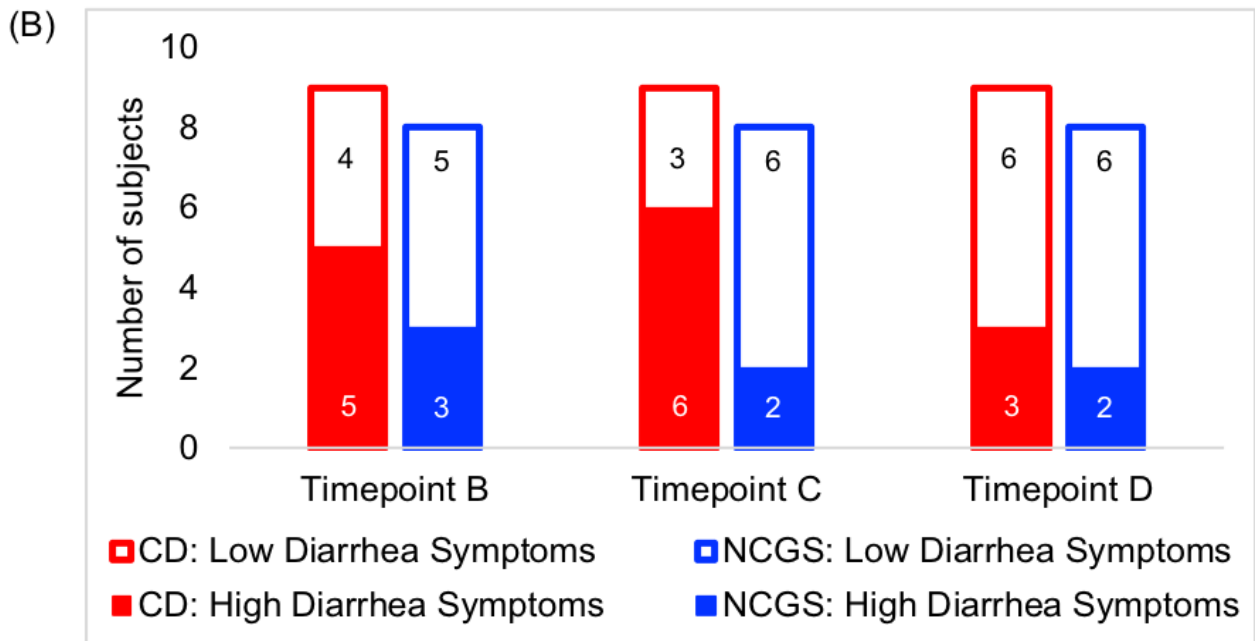

**Supplementary Figure 10.** Differential abundance of taxa within CD and NCGS groups in patients with high overall symptoms versus low overall symptoms at (A) Timepoint 3 and (B) Timepoint 4.  $P < 0.05$ .

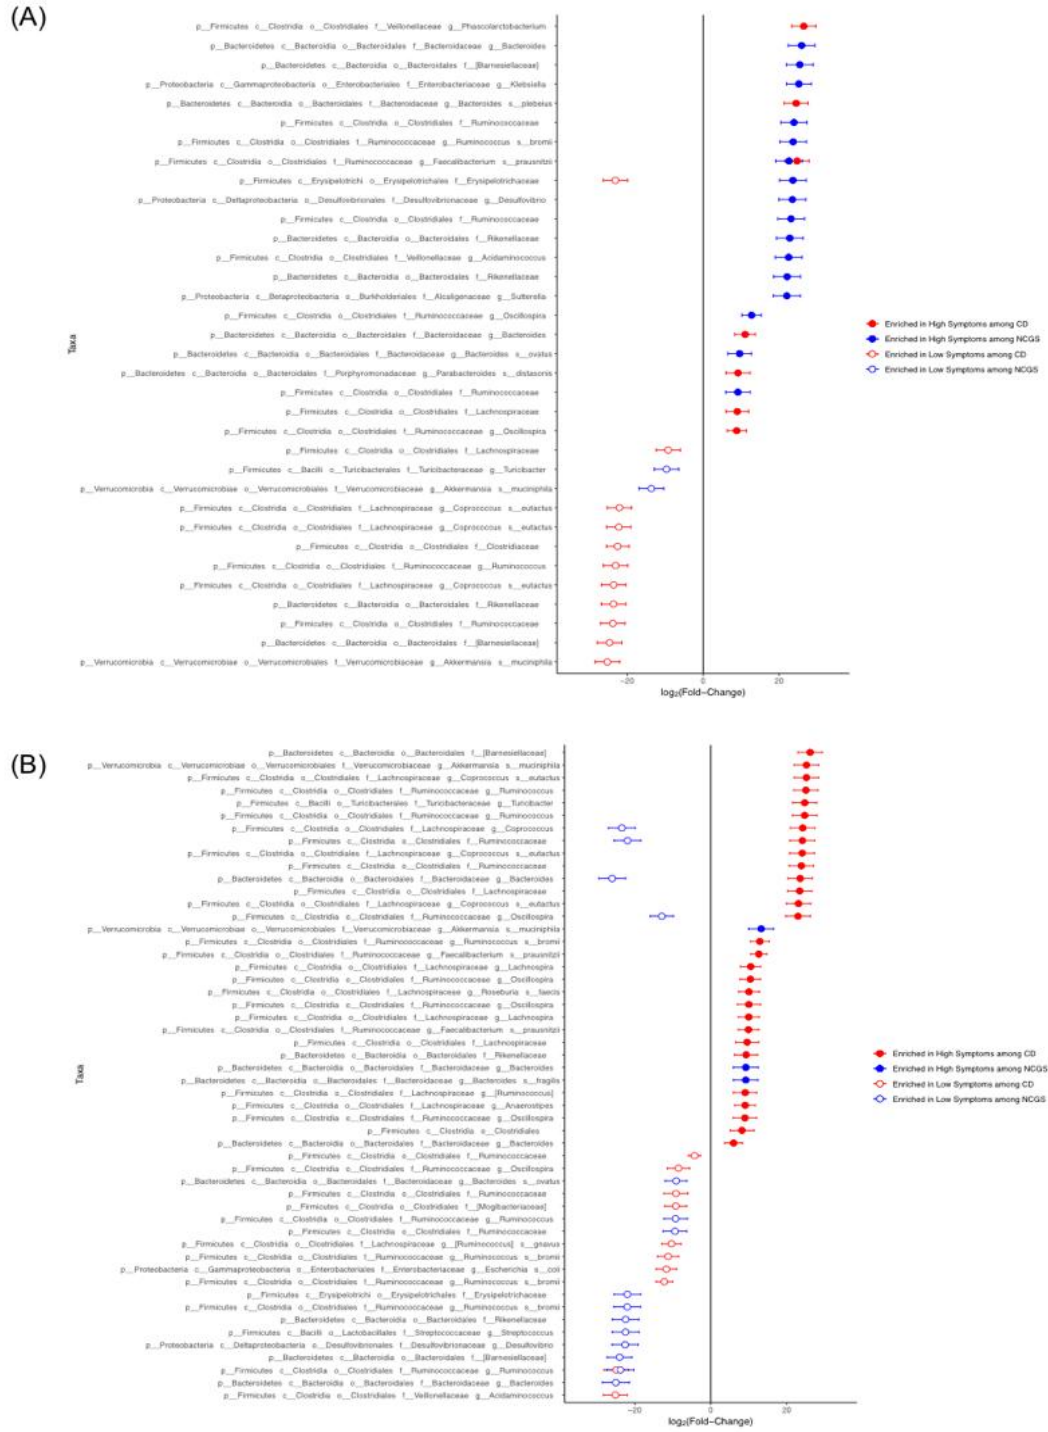

**Supplementary Figure 11.** Differential abundance of taxa within CD and NCGS groups in patients with high diarrhea symptom versus low diarrhea symptom at (A) Timepoint 3 and (B) Timepoint 4.  $P < 0.05$ .

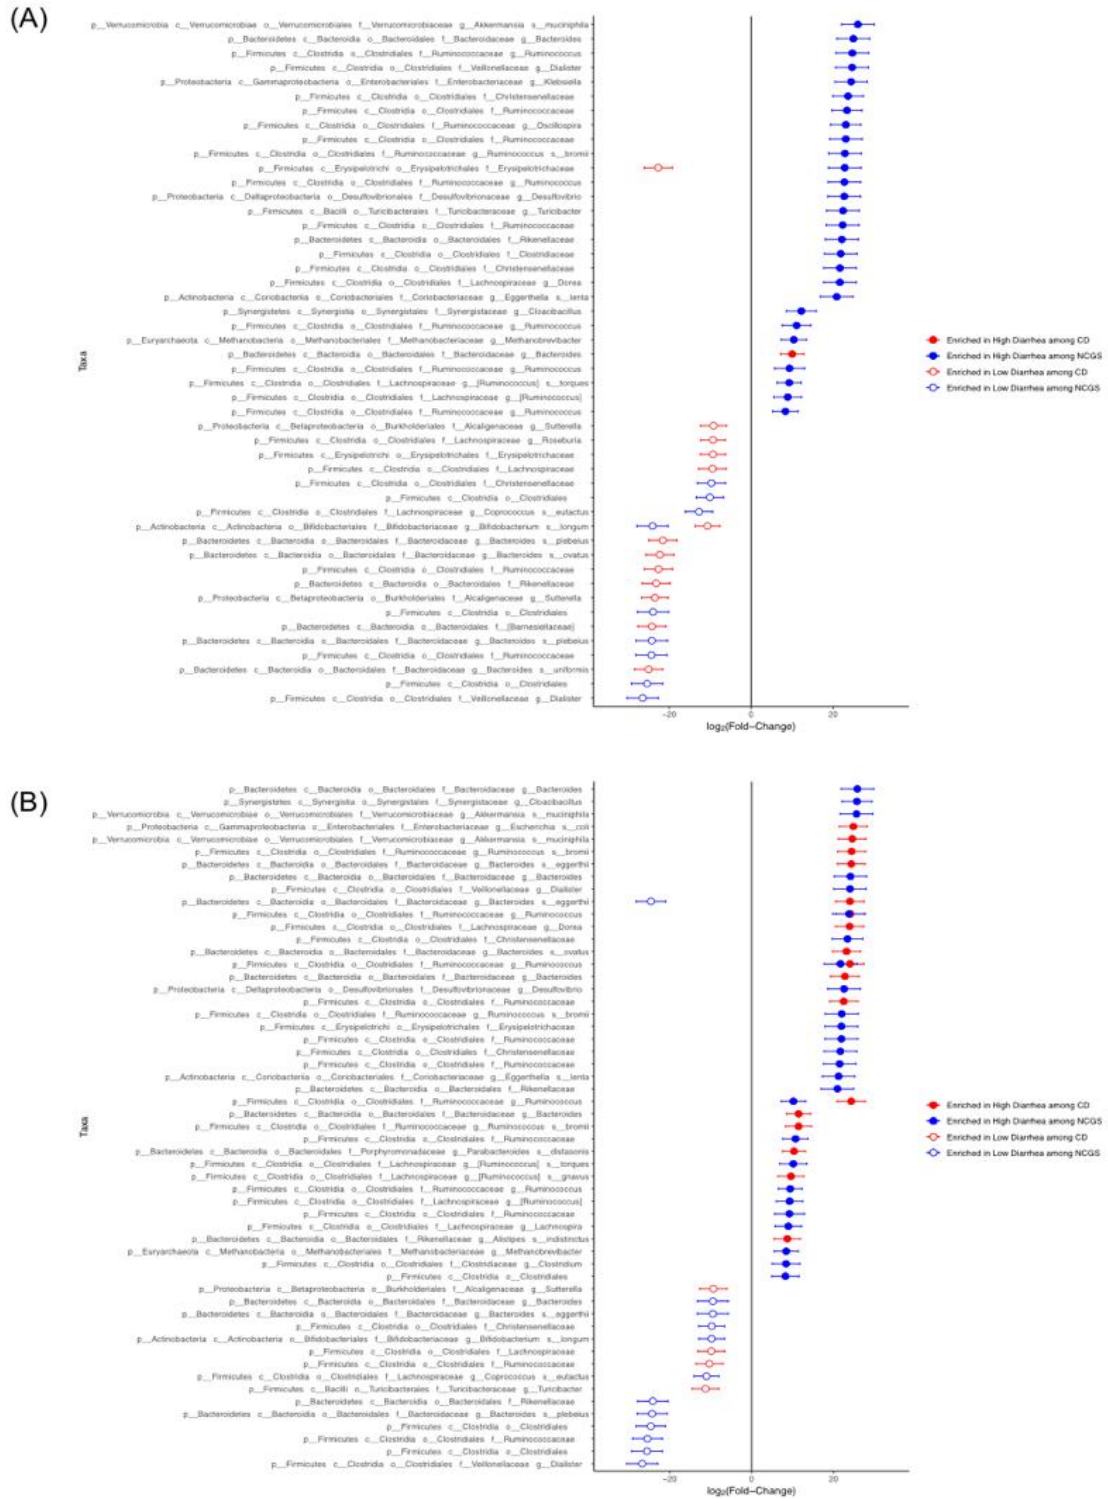

Supplement: ct9-12-e00441-s001.pdf [file ct9-12-e00441-s001.pdf]
